# Supplementary material
Source: PubMed Central journal article supplement (PMC6237272)
Supplement: NIHMS80466-supplement-Supplemental_Tables_and_Figures.pdf [file NIHMS80466-supplement-Supplemental_Tables_and_Figures.pdf]

**SUPPLEMENTAL TABLES**Table S1: Genotyping primers

| <b>Gene</b>    | <b>Forward</b>                   | <b>Reverse</b>                | <b>Amplicon (bp)</b> | <b>Annealing Temperature (°C)</b> |
|----------------|----------------------------------|-------------------------------|----------------------|-----------------------------------|
| <i>Stx1a</i>   | GCT GCA GAA GCA<br>AGA GAA CC    | CAG CCA TAC AAA<br>AAC CAC CA | WT: 404<br>Flox: 239 | 50.0                              |
| <i>Cre</i>     | CAA GCC TGG CTC<br>GAC GGC C     | CGC GAA CAT CTT<br>CAG GTT CT | 390                  | 50.0                              |
| <i>Gcg/GFP</i> | AAT TGA GCT CAT<br>TTG GAC TGC C | CTT GCC GTA GGT<br>GGC ATC G  | 210                  | 50.0                              |
| <i>GFP/GFP</i> | CTG GTA GTG GTC<br>GGC GAG C     | GTT CAG CGT GTC<br>CGG CGA G  | 470                  | 50.0                              |

Table S2: Antibody table

| <b>Sample</b>   | <b>Antigen</b> | <b>Primary Antiserum</b>                       | <b>Secondary Antiserum</b>                                       |
|-----------------|----------------|------------------------------------------------|------------------------------------------------------------------|
| Ileal Tissue    | Syntaxin1a     | Rabbit anti-syn1a, 1:500<br>(Abcam cat#41453)  | AlexaFluor488-goat anti-rabbit<br>IgG, 1:150 (Life Technologies) |
|                 | GLP-1          | Mouse anti-GLP-1, 1:400<br>(Abcam cat # 23472) | AlexaFluro555-goat anti-mouse<br>IgG, 1:150 (Life Technologies)  |
| AMIC<br>Culture | Syntaxin1a     | Rabbit anti-syn1a, 1:1000<br>(Abcam cat#41453) | AlexaFluor488-goat anti-rabbit<br>IgG, 1:150 (Life Technologies) |
|                 | GLP-1          | Mouse anti-GLP-1, 1:200<br>(Abcam cat # 23472) | AlexaFluro555-goat anti-mouse<br>IgG, 1:150 (Life Technologies)  |

Table S3: qRT-PCR Primer/Probes (all from Applied Biosystems)

| <b>Transcript</b> | <b>Product number</b> | <b>Exons targeted</b> |
|-------------------|-----------------------|-----------------------|
| <i>Gcg</i>        | Mm00801714_m1         | 5-6                   |
| <i>H3f3a</i>      | Mm01612808_g1         | 3-4                   |
| <i>Stx1a</i>      | Mm004444008_m1        | 1-2                   |
| <i>Stx1b</i>      | Mm01275274_m1         | 1-2                   |
| <i>Stx2</i>       | Mm04229900_m1         | 2-3                   |
| <i>Stx3</i>       | Mm01197689_m1         | 6-7                   |
| <i>Stx4</i>       | Mm00436827_m1         | 5-6                   |

## SUPPLEMENTAL MATERIALS

### Supplemental Figure Legends

Figure S1: Body weight (**A**), small intestinal weight (**B**) and small intestinal weight normalized to body weight (**C**) in the male vs. female control and IE-syn1a KO mice shown in Figure 2. All data are shown as mean  $\pm$  SD.

Figure S2: Blood glucose (**A**), and plasma insulin (**B**) levels in the male vs. female control and IE-syn1a KO mice shown in Figure 3. All data are shown as mean  $\pm$  SD.

Figure S3: Plasma GLP-1 (**A**), and GIP (**B**) levels in the male vs. female control and IE-syn1a KO mice shown in Figure 3. All data are shown as mean  $\pm$  SD.

Figure S4: (**A-B**) Male C57Bl/6 mice were administered ileal AdV-RFP (control) or AdV-iCre followed by intra-ileal administration of OEA 2 d later, and determination of mucosal *Stx1a* mRNA transcript levels (**A**) and plasma GLP-1 levels (**B**; n=3-4). (**C-D**) AMIC cultures from male C57Bl/6 mice were treated with AdV-RFP (control) or AdV-iCre for 2 d, followed by 2 hr treatment with vehicle (basal), forskolin plus IBMX or OEA for 2 hr, and determination of cell *Stx1a* mRNA transcript levels (**C**) and GLP-1 content in the media and cells (**D**; n=4). All data are shown as mean  $\pm$  SD.

Figure S5: Body weight (**A**), small intestinal weight (**B**) and small intestinal weight normalized to body weight (**C**) in the male vs. female control and Venus-IE-syn1a-KO mice shown in Figure 5. All data are shown as mean  $\pm$  SD.

Figure S6: Blood glucose levels in the male vs. female control and Venus-IE-syn1a KO mice shown in Figure 5. All data are shown as mean  $\pm$  SD.

Figure S7: Representative 2-photon images of full and compound fusion events using SRB (red) and Venus (green), as visualized in the respective cells shown in Figure 6A.

Supplemental Video 1: Full-field view of a Venus<sup>+</sup> L-cell (green) surrounded by unlabelled cells. Forskolin was added at t = 30 sec. Note the large granule size and multiple fusion events occurring in a single neighbouring cell (arrow), consistent with the known properties of mast cells. The same video is submitted in both .avi and .mp4 format.

Supplemental Video 2: Single granule, full fusion event at t = 577.8 sec in the membrane of a Venus<sup>+</sup> L-cell. The same video is submitted in both .avi and .mp4 format.

Supplemental Video 3: Multi-granular, compound fusion event at t = 129.3 – 255.3 sec in the membrane of a Venus<sup>+</sup> L-cell. The same video is submitted in both .avi and .mp4 format.

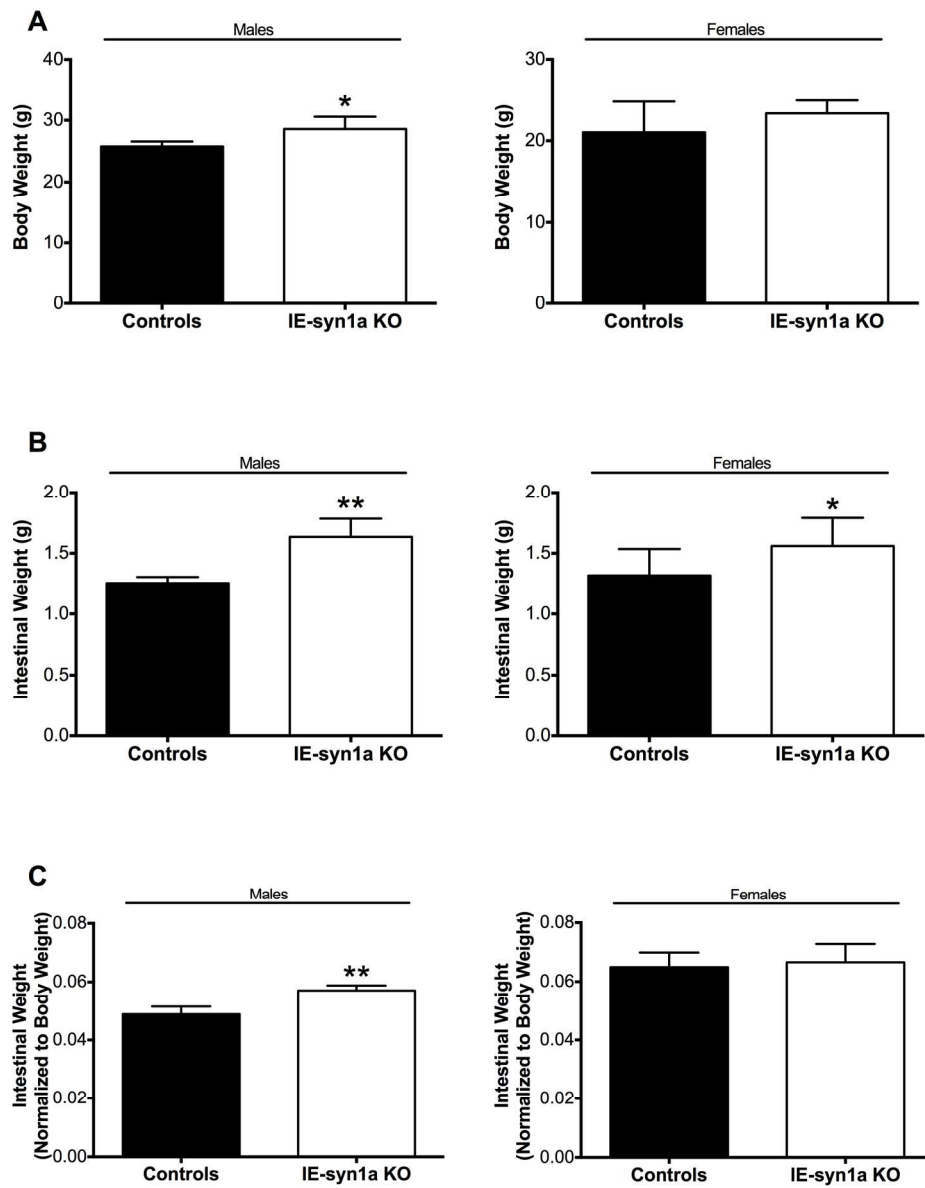

178x216mm (300 x 300 DPI)

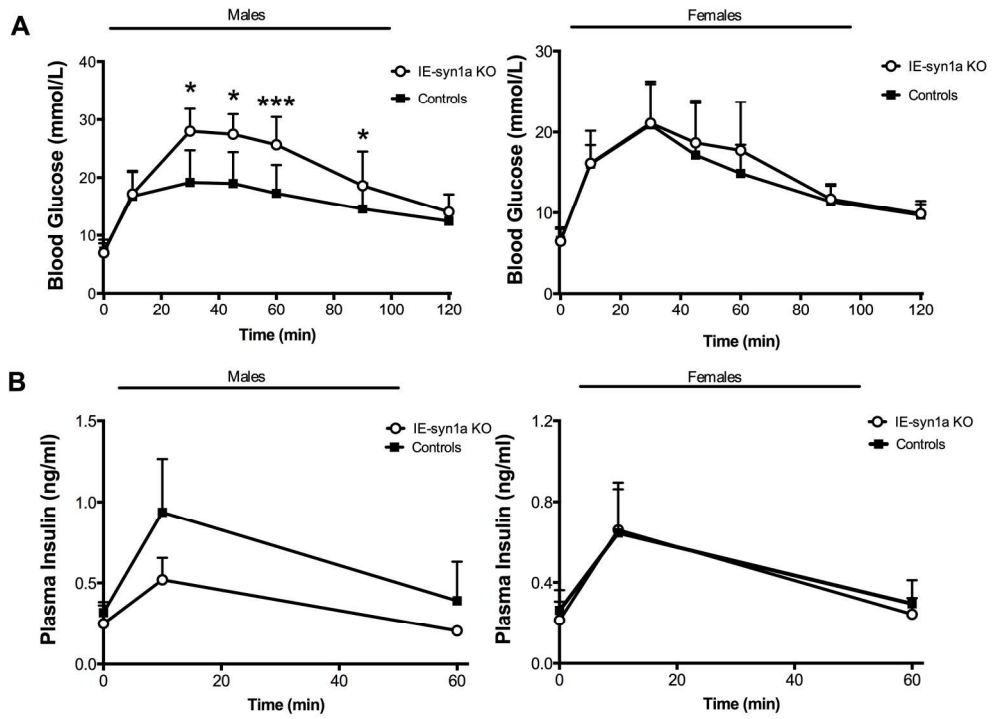

187x136mm (300 x 300 DPI)

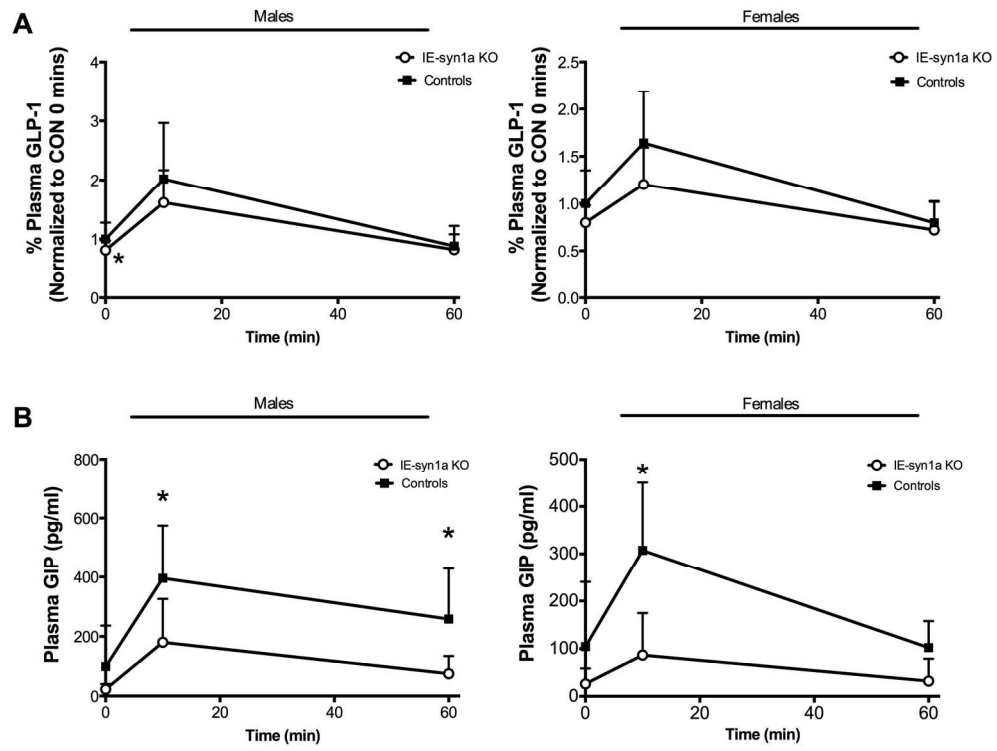

178x135mm (300 x 300 DPI)

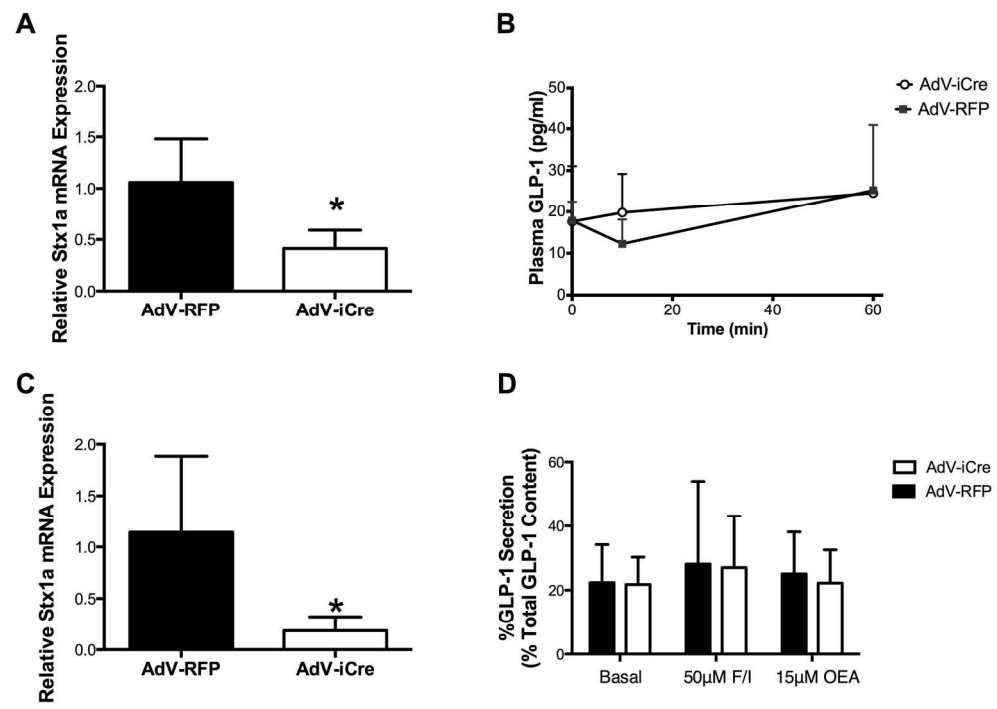

179x130mm (300 x 300 DPI)



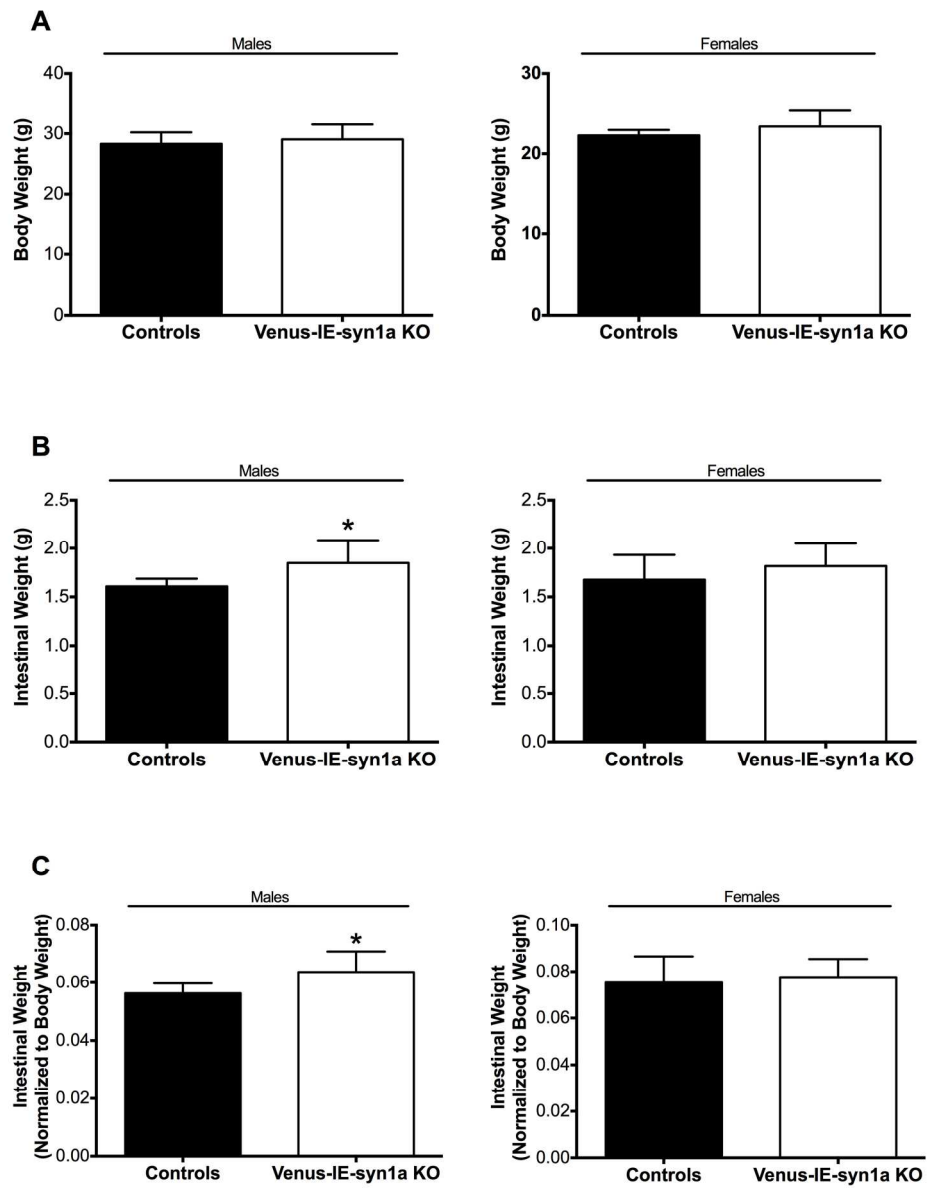

178x218mm (300 x 300 DPI)

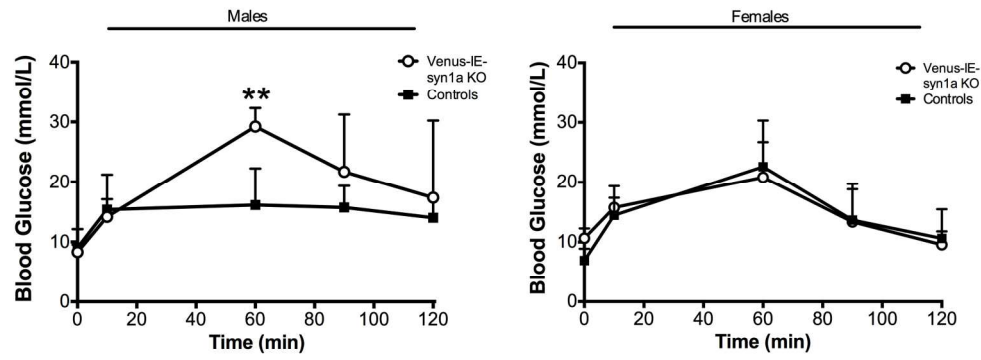

175x65mm (300 x 300 DPI)

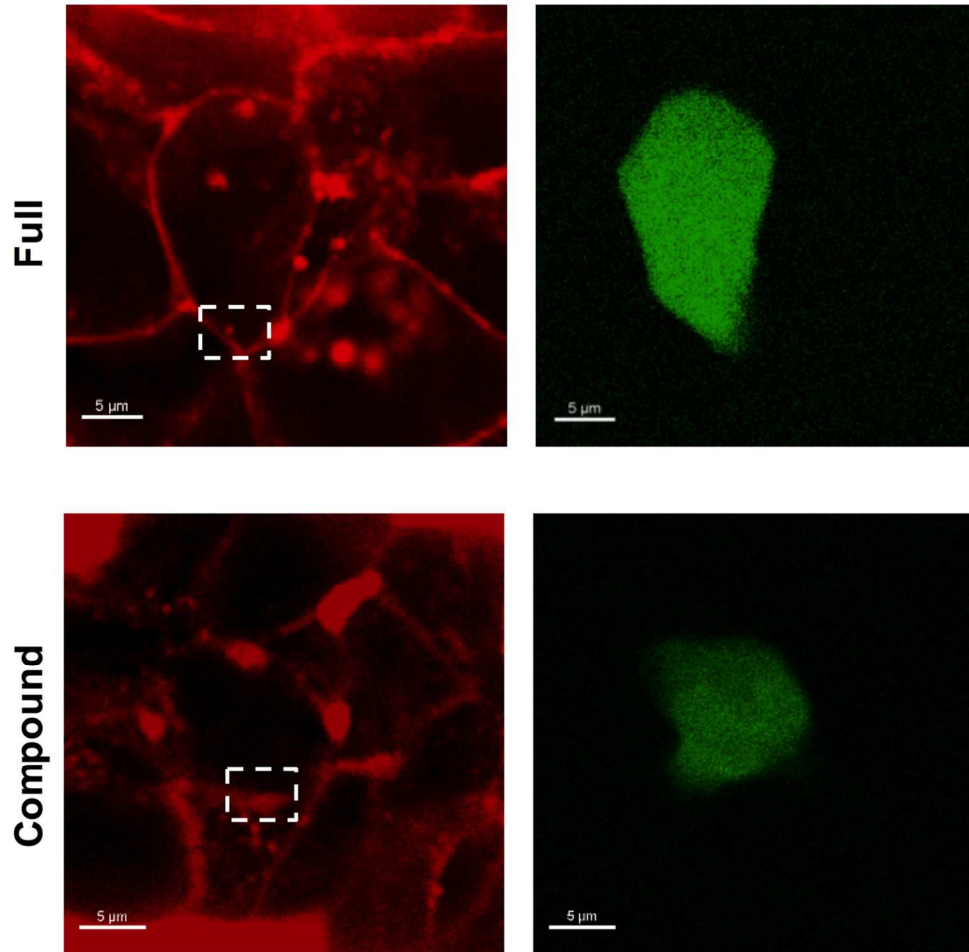

128x129mm (300 x 300 DPI)
